# Supplementary material for: Electrochemical redox signaling of hemoglobin in human whole blood and its relevance to anemia and thalassemia diagnosis
Source: Royal Society of Chemistry journal article supplement (doi:10.1039/c5an02646f), 2016-01-01
Supplement: c5an02646f1.pdf [file c5an02646f1.pdf]

*Supporting information*

**Electrochemical redox signaling of hemoglobin in human whole blood and its clinical relevance to hemoglobin analysis and *thalassemia* diagnosis**

*Khairunnisa Amreen and Annamalai Senthil Kumar\**

Environmental and Analytical Chemistry Division, School of Advanced Sciences, Vellore Institute of Technology University, Vellore-632 014, India.

**1.Experimental Section**

**1.1 Materials and Reagents**

Human blood sample was taken from an adult 22 year old female from the health care center of VIT University, Vellore, Tamil Nadu. This was a normal blood sample used as an optimal. 15 more blood samples were collected from various VIT students, VIT health center's laboratory and Nalam medical center – Vellore. Diseased blood samples were taken from a government hospital in Chennai. Lyophilized Hemoglobin was purchased from Sigma Aldrich, graphitized mesoporous carbon (GMC, purity assay= >99.95%, <500nm pore size), multi-walled carbon nano tube (MWCNT, with ~90% purity assay), activated charcoal, graphene, carbon mesoporous hydrophilic, carbon mesoporous hydrophobic were purchased from Sigma Aldrich (USA). Graphite nanopowder (400nm, ~98% purity) was received from SRL(India), Nafion (5%) was purchased from Sigma Aldrich (USA). The supporting electrolyte used here is 20 min N<sub>2</sub> purged pH 7 phosphate buffer solution (PBS). Other basic chemicals of analytical grade were also used.

**1.2 Apparatus.**

Cyclic voltammetry (CV) experiment was performed on CHI model 660C work-station, USA with 10 mL working volume. The three working electrode system consists of Ag/AgCl with 3 M KCl as reference electrode, platinum wire as a counter electrode and modified glassy carbon electrode (GCE) as a working electrode with the surface area of  $0.0707\text{ cm}^2$ . Raman spectroscopy analyses were carried out using AZILTRON, PRO 532(USA) with 532 nm Laser excitation source. FTIR analysis was done by using JASCO 4100 Spectrophotometer by KBr method. ATR/FTIR spectroscopy measurements for SPE modified with the proposed hybrid materials were performed by using JASCO FTIR-460 PLUS spectrometer equipped with an ATR cell. UV-Vis analysis was carried out by using UV-Vis NIR spectrophotometer, JASCO V-670, Germany.

### 1.3 Procedure

The surface of GCE was cleaned mechanically by polishing with  $0.5\text{ }\mu\text{m}$  alumina powder, washing with DD water followed by sonication of electrode in acetone for 1 min. Then cyclic voltammetry was used for electrochemical treatment of electrode in a potential window of -0.2 to 1 V vs Ag/AgCl for 10 cycles at a potential scan rate  $\nu = 50\text{ mV s}^{-1}$  in pH 7 PBS. GCE/GMC was prepared by coating of  $5\text{ }\mu\text{L}$  of GMC-ethanol suspension ( $2\text{ mg mL}^{-1}$ ) on a clean GCE surface and air dried at room temperature for  $5\pm 1$  minutes. Then, a mixture of  $8\text{ }\mu\text{L}$  of human whole blood (anticoagulant EDTA (electro-inactive compound) added and stored in refrigerator at  $5\pm 2^\circ\text{C}$ ) +  $2\text{ }\mu\text{L}$  of pH 7 PBS was drop casted and air dried for  $20\pm 2$  minutes.  $5\text{ }\mu\text{L}$  of 1% Nf-ethanolic solution were successively drop casted on the GCE/GMC@Blood and air-dried for  $5\pm 1$  minutes. All other carbon nanomaterial-blood modified electrodes were prepared same as above.

**Figure S1**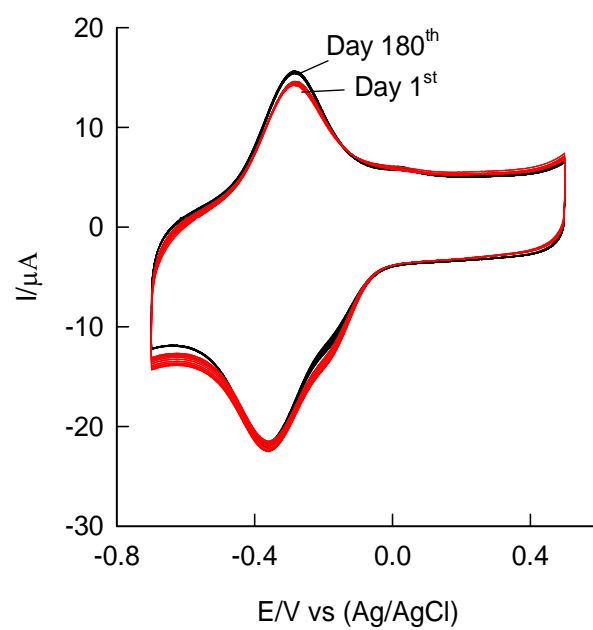

**Figure S1. GCE/GMC@Blood :** Continuous CV responses of GCE/GMC@Blood/Nf in N<sub>2</sub> purged pH 7 PBS at scan rate of 50 mV s<sup>-1</sup> stored in refrigerator for six months.

**Figure S2**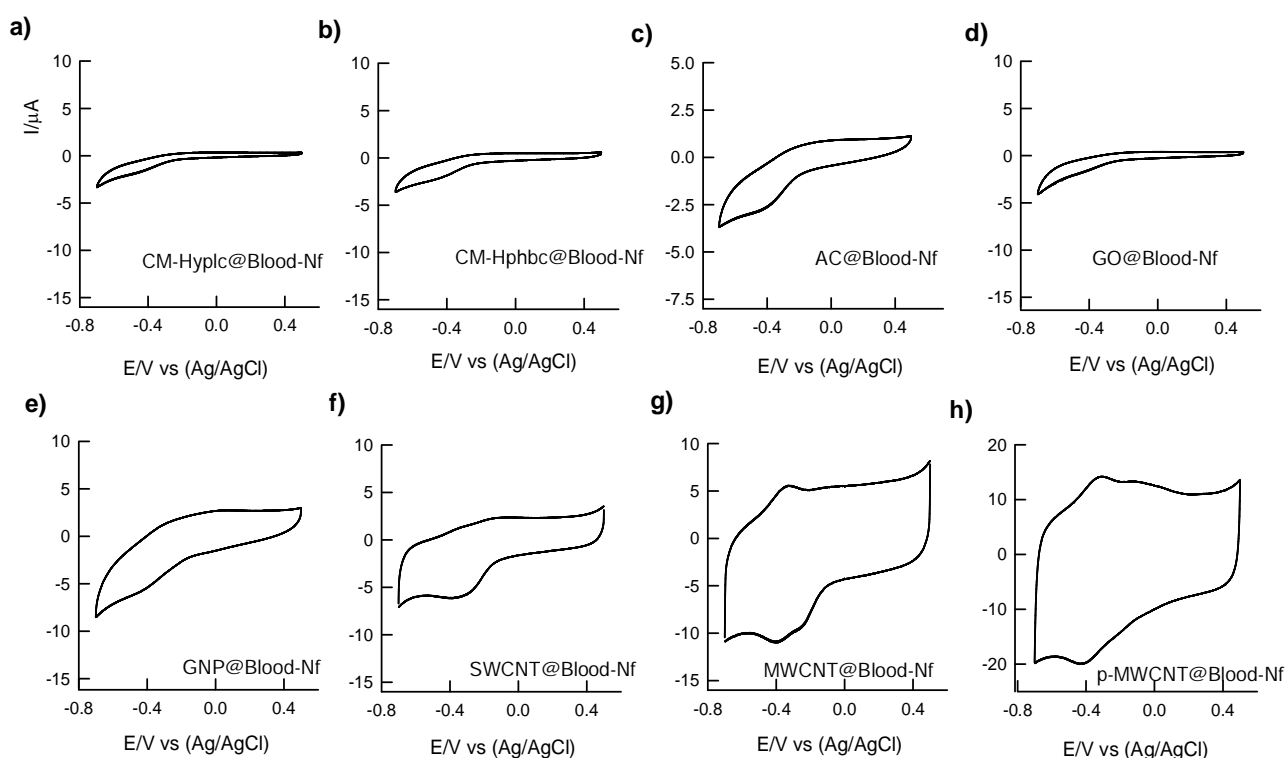

**Figure S2. CV responses of various GCE/carbon nanomaterial@ Blood-Nf systems:** a) Carbon mesoporous hydrophilic (CM-HypIc), b) Carbon mesoporous hydrophobic (CM-Hphbc), c) Activated charcoal (AC), d) Graphene oxide (GO), e) Graphite nano powder (GNP), f) single walled carbon nanotube (SWCNT), g) multiwalled carbon nanotube (MWCNT) and (h) purified MWCNT (p-MWCNT) as a matrix for the blood chemically modified electrode. Electrolyte= pH 7 nitrogen purged phosphate buffer solution. Scan rate=50 mV s<sup>-1</sup>.

**Figure S3**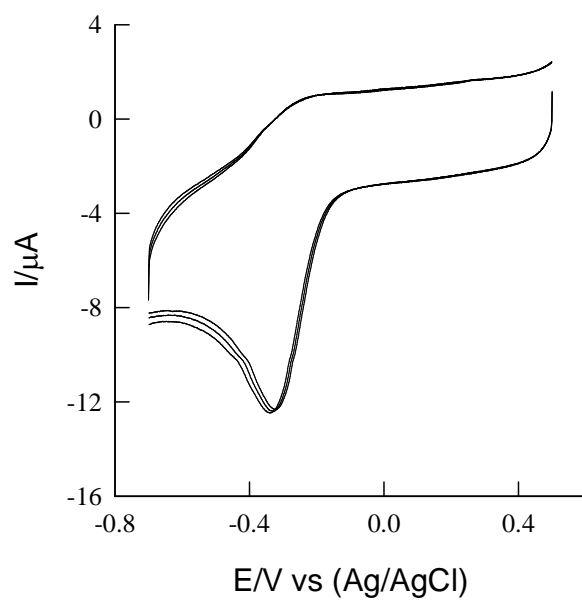

**Figure S3. GCE/GMC@Blood :** (Control) Continuous CV responses of GCE/GMC@Blood (without Nafion) in  $\text{N}_2$  purged pH 7 PBS at scan rate of  $50 \text{ mV s}^{-1}$ .
